# Supplementary material for: (+)-epi-Epoformin, a Phytotoxic Fungal Cyclohexenepoxide: Structure Activity Relationships
Source: PubMed Central journal article supplement (PMC6100255; doi:10.3390/molecules23071529), 2018-06-25
Supplement: molecules-23-01529-s001.pdf [file molecules-23-01529-s001.pdf]

SUPPORTING INFORMATION

**(+)-*epi*-Epoformin, a phytotoxic fungal cyclohexenepoxide: Structure activity relationships**

Antonio Cala<sup>1,†</sup>, Marco Masi<sup>2,†</sup>, Alessio Cimmino<sup>2</sup>, José M.G. Molinillo<sup>1</sup>, Francisco A. Macias<sup>1</sup> and Antonio Evidente<sup>2</sup>

- 1 Allelopathy Group, Department of Organic Chemistry, School of Science, Institute of Biomolecules (INBIO), University of Cádiz, C/ República Saharaui 7, 11510-Puerto Real, Cádiz, Spain; antonio.cala@uca.es (A.C.); chema.gonzalez@uca.es (J.M.G.M.), famacias@uca.es (F.A.M.).
- 2 Department of Chemical Sciences, University of Naples "Federico II", Complesso Universitario Monte S. Angelo, Via Cintia 4, 80126 Napoli, Italy; marco.masi@unina.it (M.M.); alessio.cimmino@unina.it (A.C.), evidente@unina.it (A.E.).

<sup>†</sup> These authors contributed equally to this work.

\*Correspondence:

## Table of Contents

|      |                                                     |
|------|-----------------------------------------------------|
| S3.  | <sup>1</sup> H NMR Spectrum of 1                    |
| S4.  | <sup>1</sup> H and <sup>13</sup> C NMR Spectra of 2 |
| S5.  | <sup>1</sup> H and <sup>13</sup> C NMR Spectra of 3 |
| S6.  | <sup>1</sup> H and <sup>13</sup> C NMR Spectra of 4 |
| S7.  | <sup>1</sup> H and <sup>13</sup> C NMR Spectra of 5 |
| S8.  | <sup>1</sup> H and <sup>13</sup> C NMR Spectra of 6 |
| S9.  | <sup>1</sup> H and <sup>13</sup> C NMR Spectra of 7 |
| S10. | <sup>1</sup> H and <sup>13</sup> C NMR Spectra of 8 |
| S11. | <sup>1</sup> H and <sup>13</sup> C NMR Spectra of 9 |

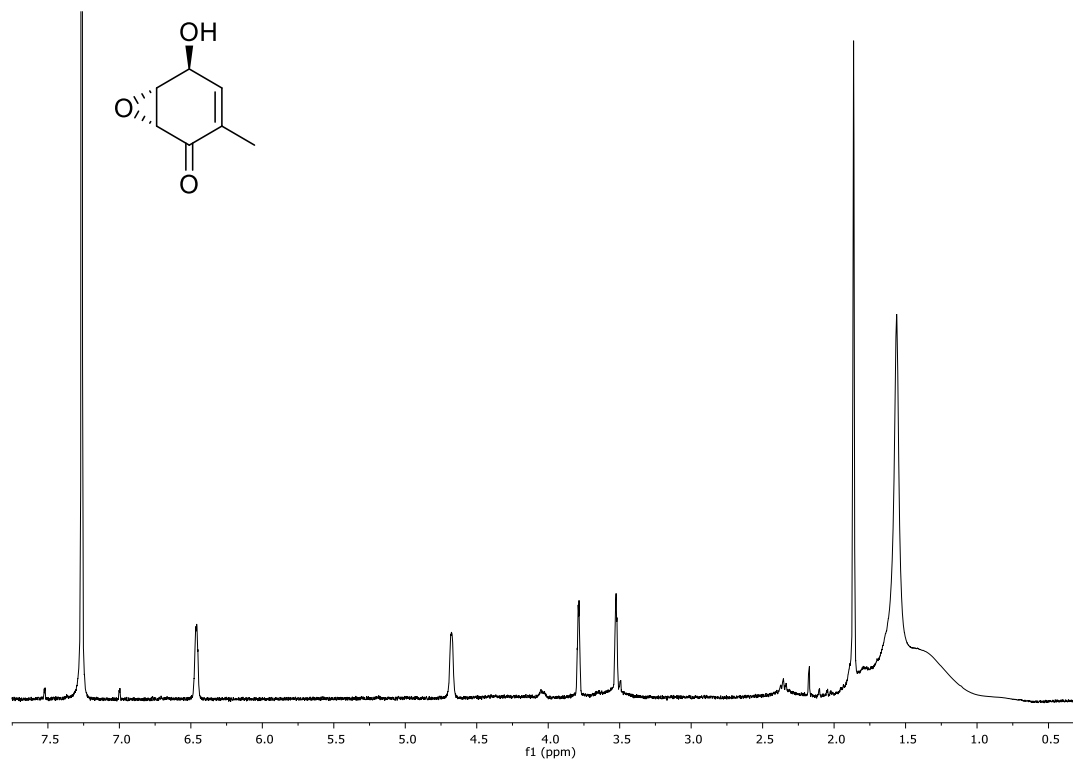

$^1\text{H-NMR}$  Spectrum of **1** (400MHz,  $\text{CDCl}_3$ )

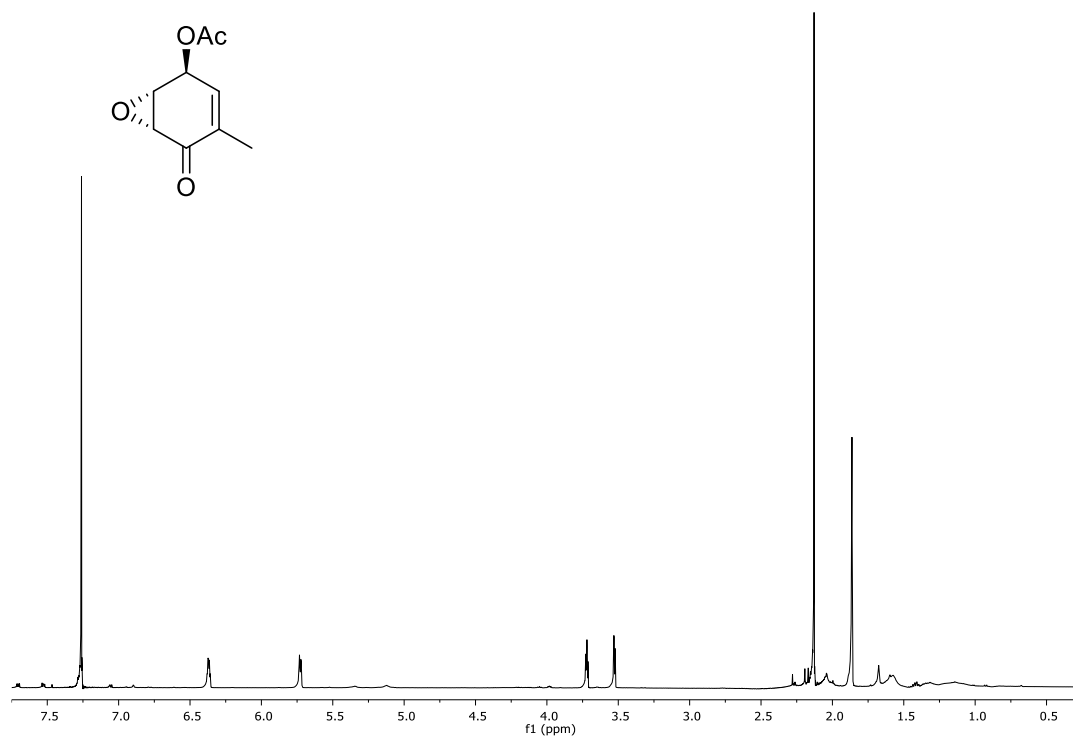

<sup>1</sup>H-NMR Spectrum of 2 (500MHz, CDCl<sub>3</sub>)

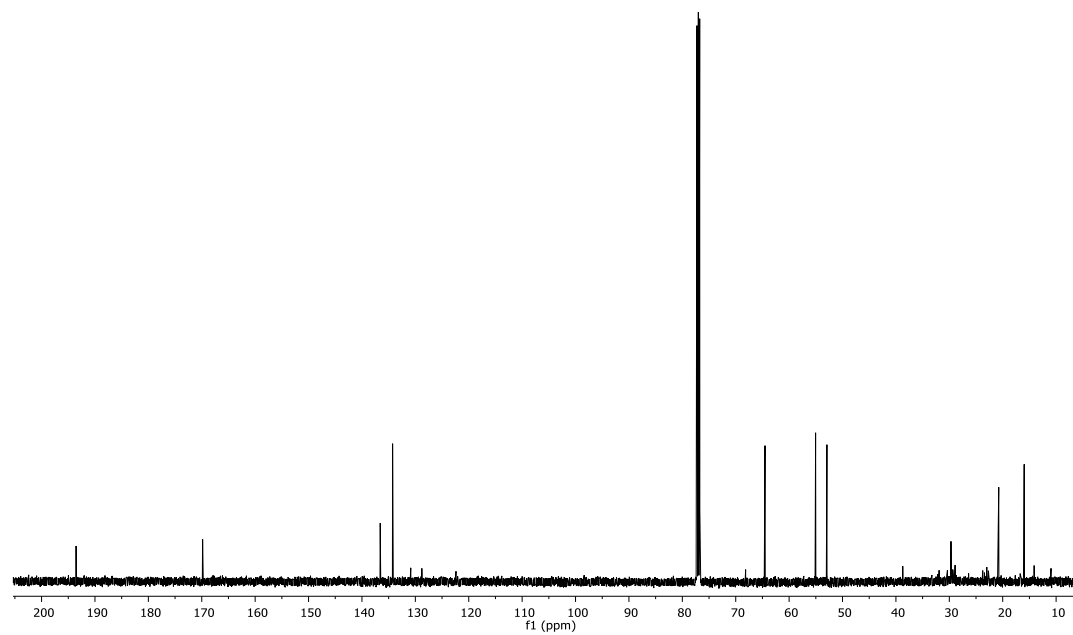

<sup>13</sup>C-NMR Spectrum of 2 (125MHz, CDCl<sub>3</sub>)

(+)-*epi*-Epoformin, a phytotoxic fungal cyclohexenepoxide: Structure activity relationships

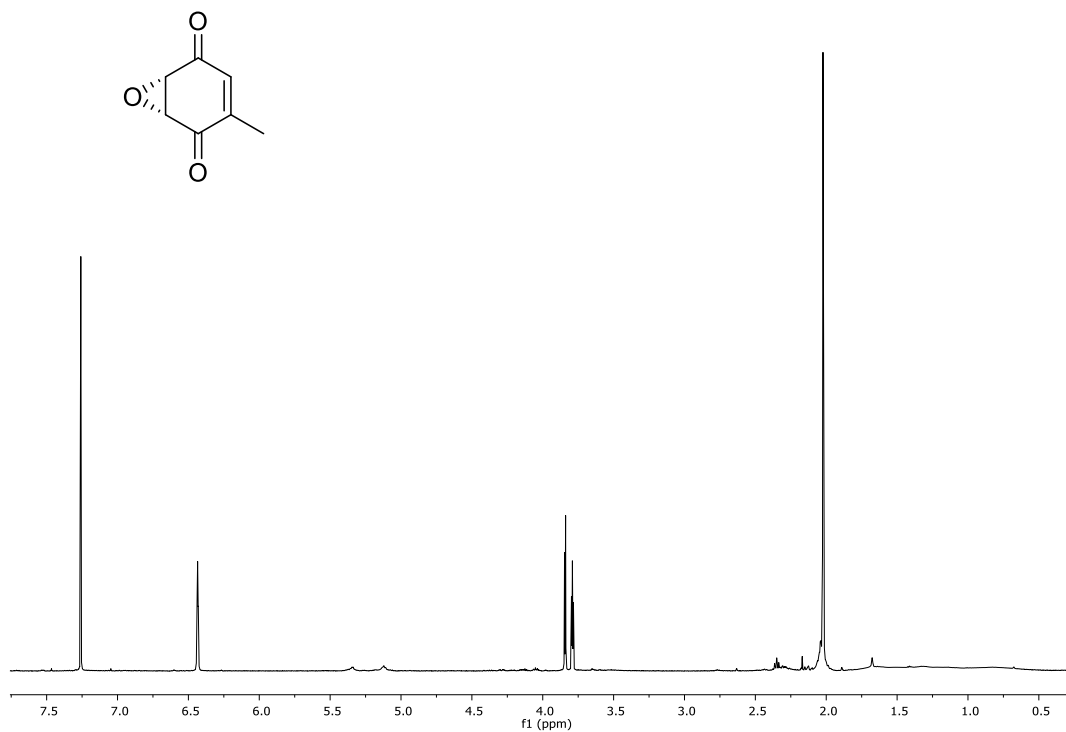

<sup>1</sup>H-NMR Spectrum of **3** (500MHz, CDCl<sub>3</sub>)

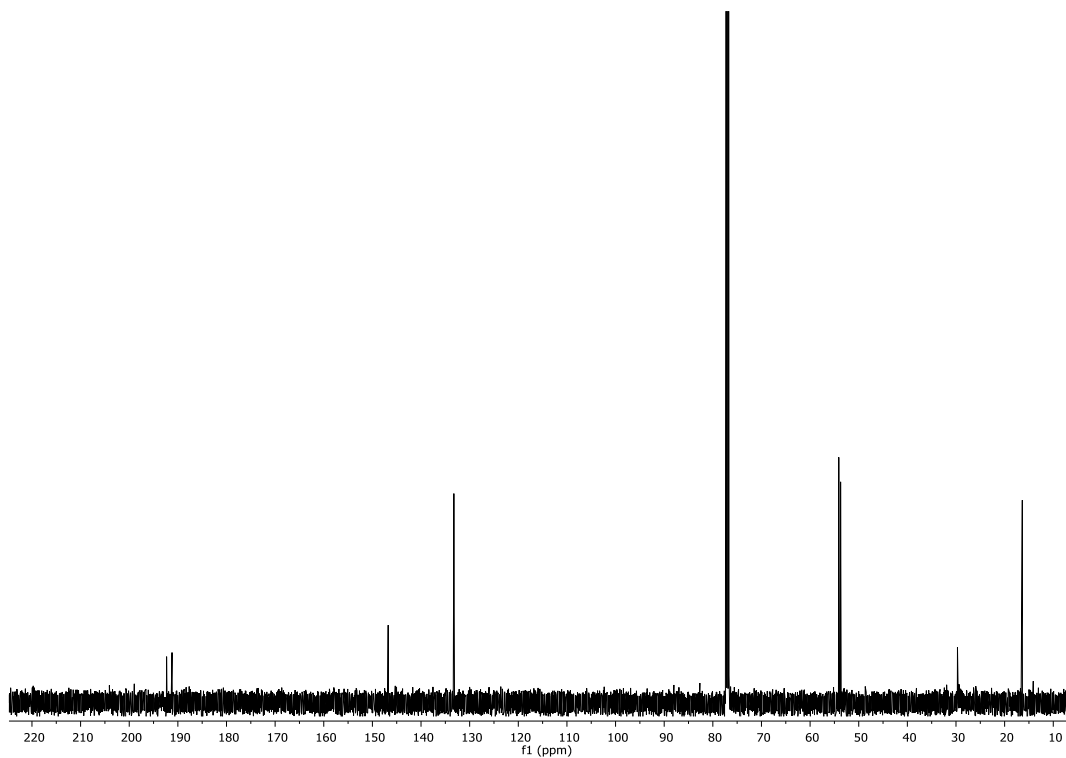

<sup>13</sup>C-NMR Spectrum of **3** (125MHz, CDCl<sub>3</sub>)

(+)-*epi*-Epoformin, a phytotoxic fungal cyclohexenepoxide: Structure activity relationships

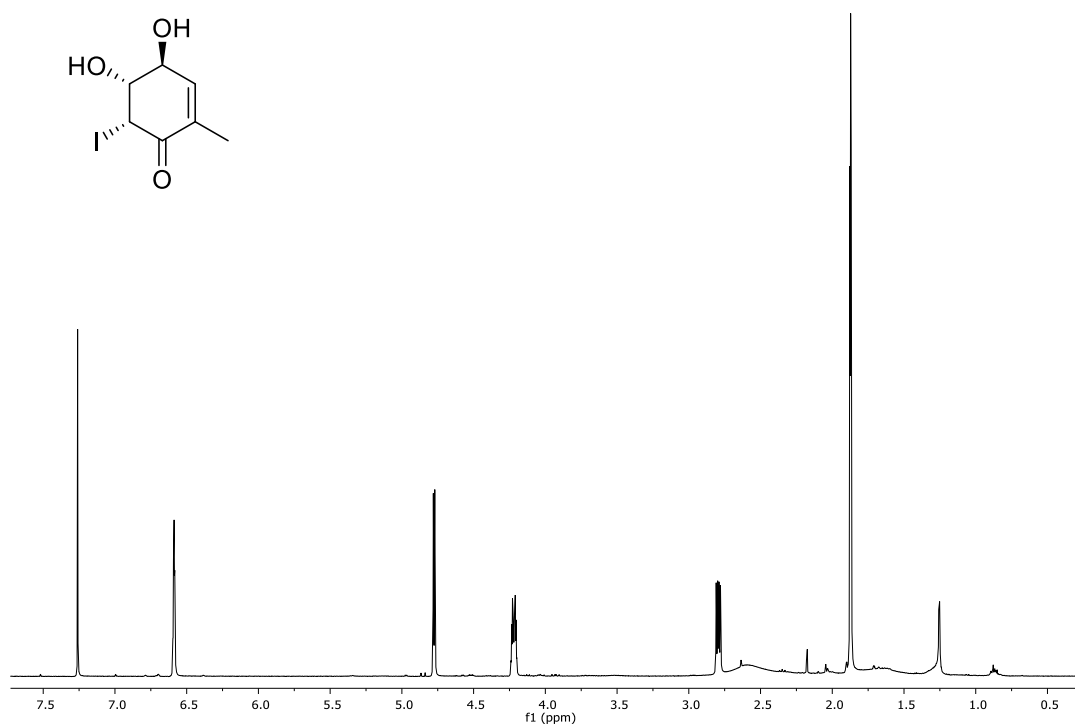

<sup>1</sup>H-NMR Spectrum of **4** (400MHz, CDCl<sub>3</sub>)

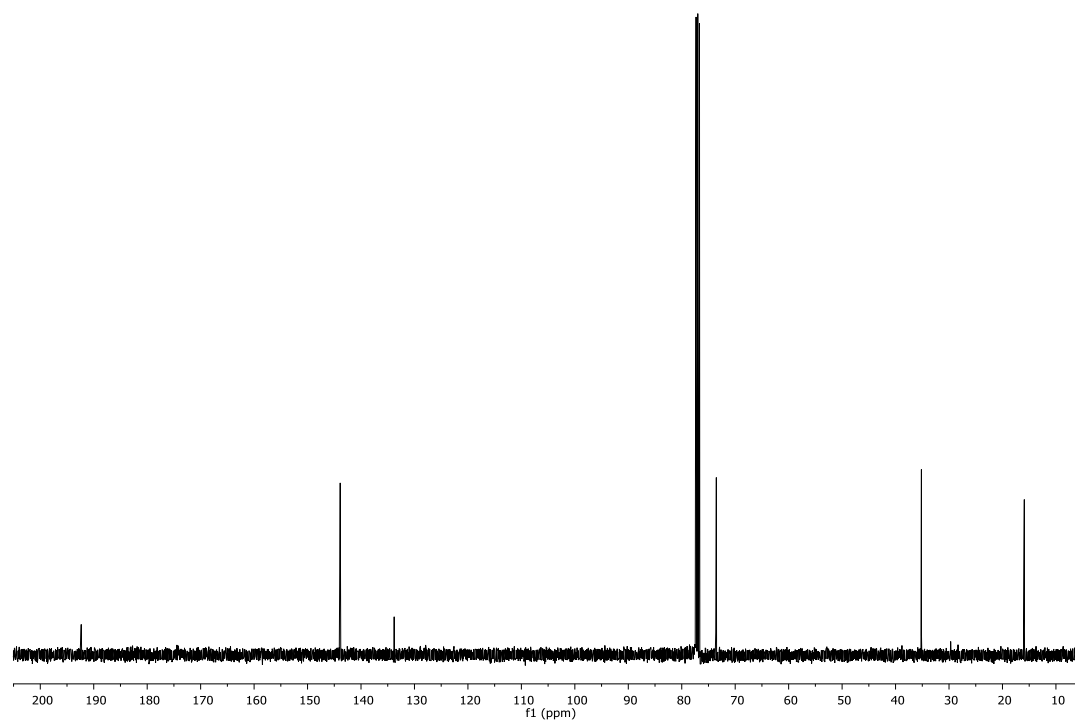

<sup>13</sup>C-NMR Spectrum of **4** (100MHz, CDCl<sub>3</sub>)

(+)-*epi*-Epoformin, a phytotoxic fungal cyclohexenepoxide: Structure activity relationships

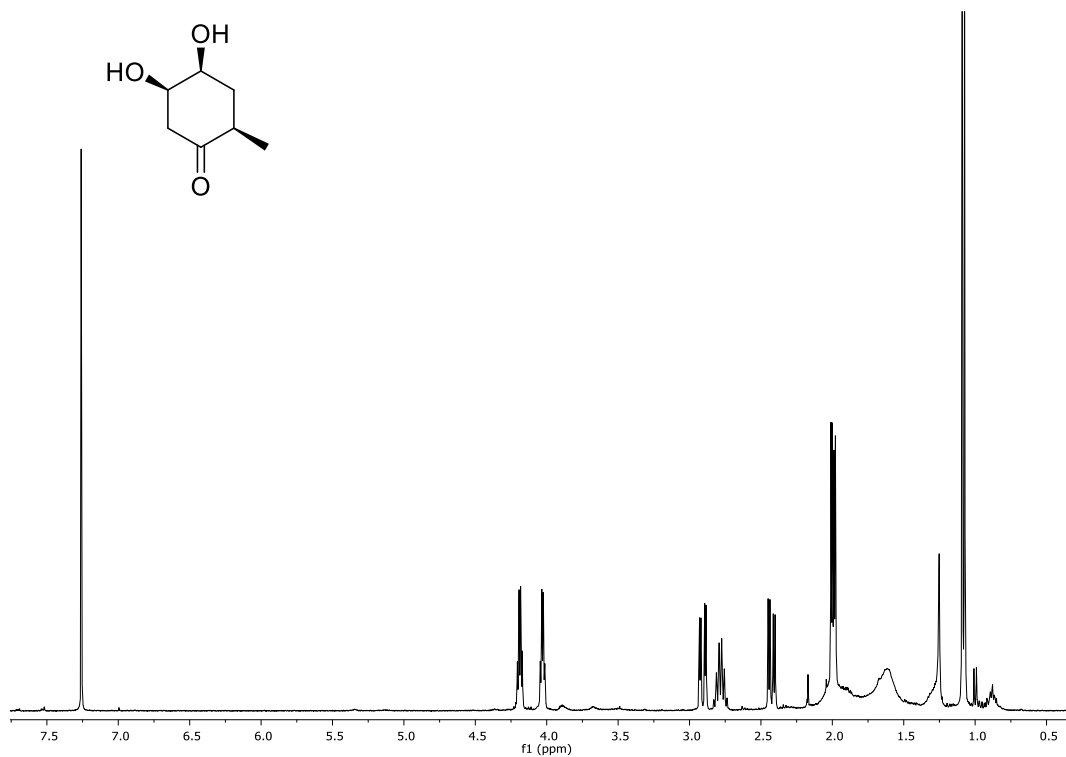

<sup>1</sup>H-NMR Spectrum of 5 (500MHz, CDCl<sub>3</sub>)

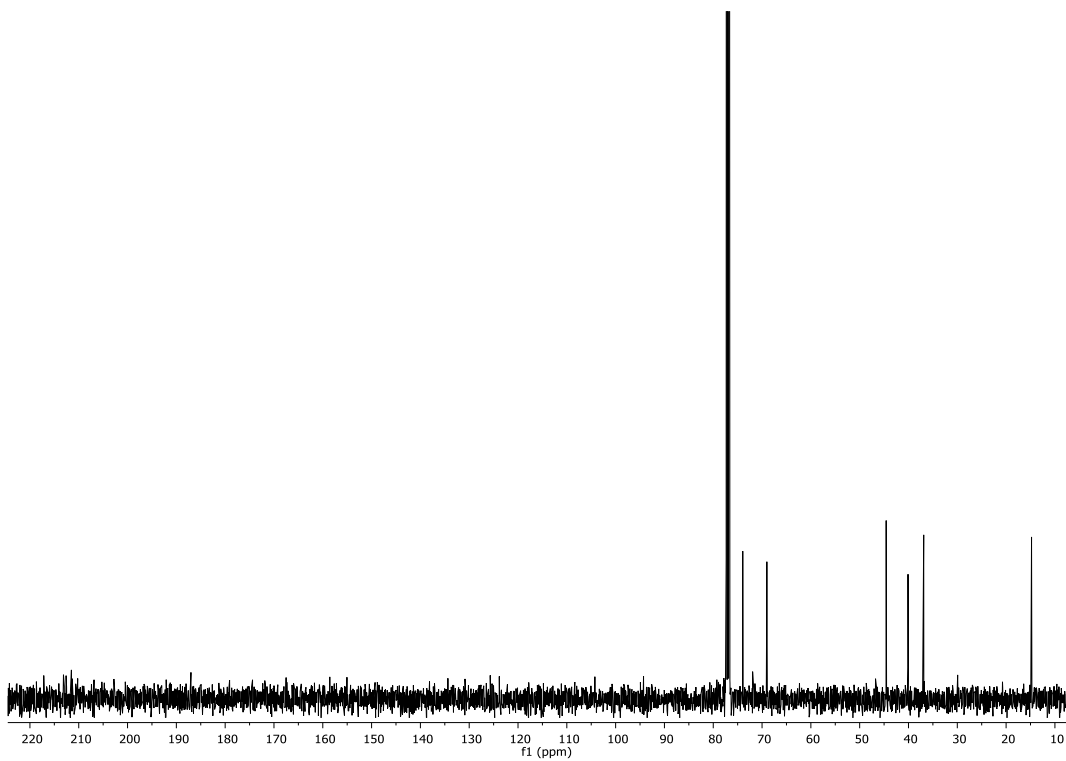

<sup>13</sup>C-NMR Spectrum of 5 (125MHz, CDCl<sub>3</sub>)

(+)-*epi*-Epoformin, a phytotoxic fungal cyclohexenepoxide: Structure activity relationships

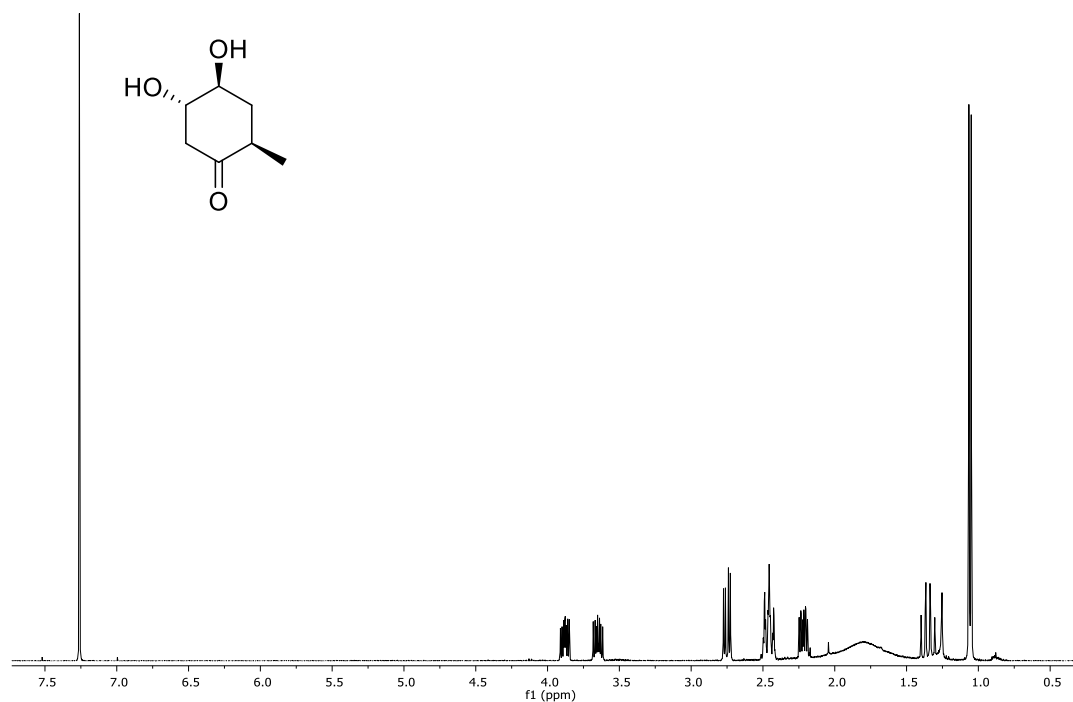

<sup>1</sup>H-NMR Spectrum of **6** (400MHz, CDCl<sub>3</sub>)

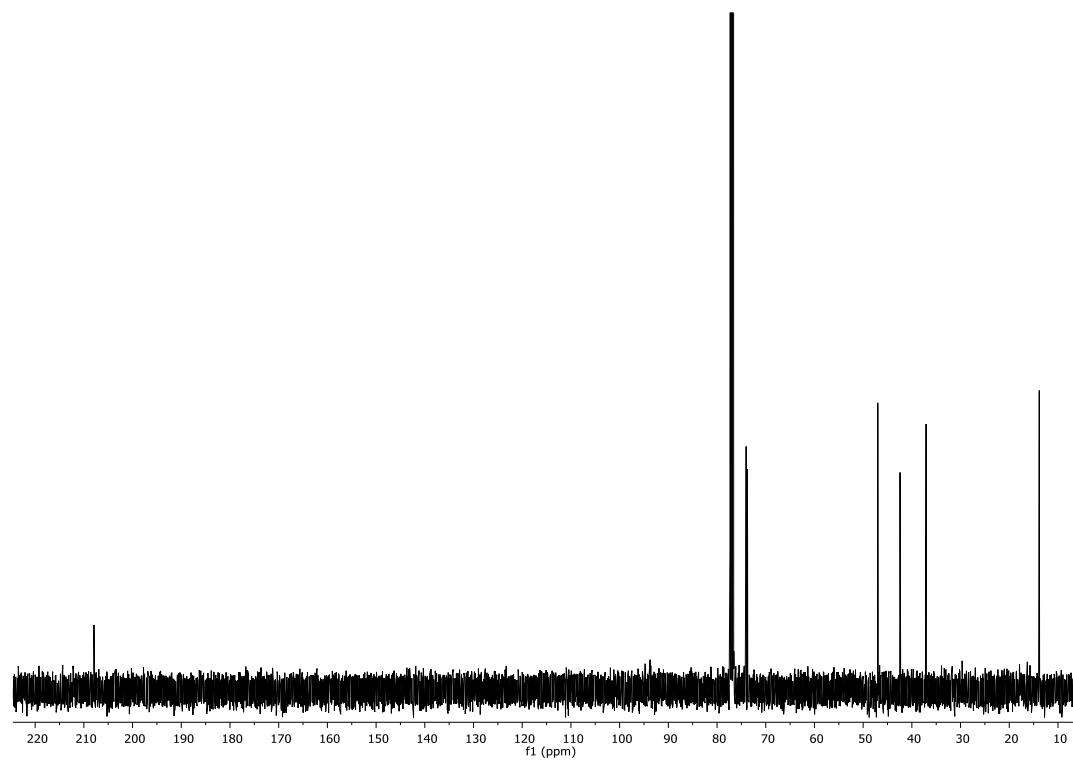

<sup>13</sup>C-NMR Spectrum of **6** (100MHz, CDCl<sub>3</sub>)

(+)-*epi*-Epoformin, a phytotoxic fungal cyclohexenepoxide: Structure activity relationships



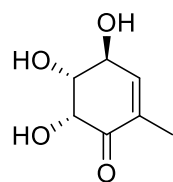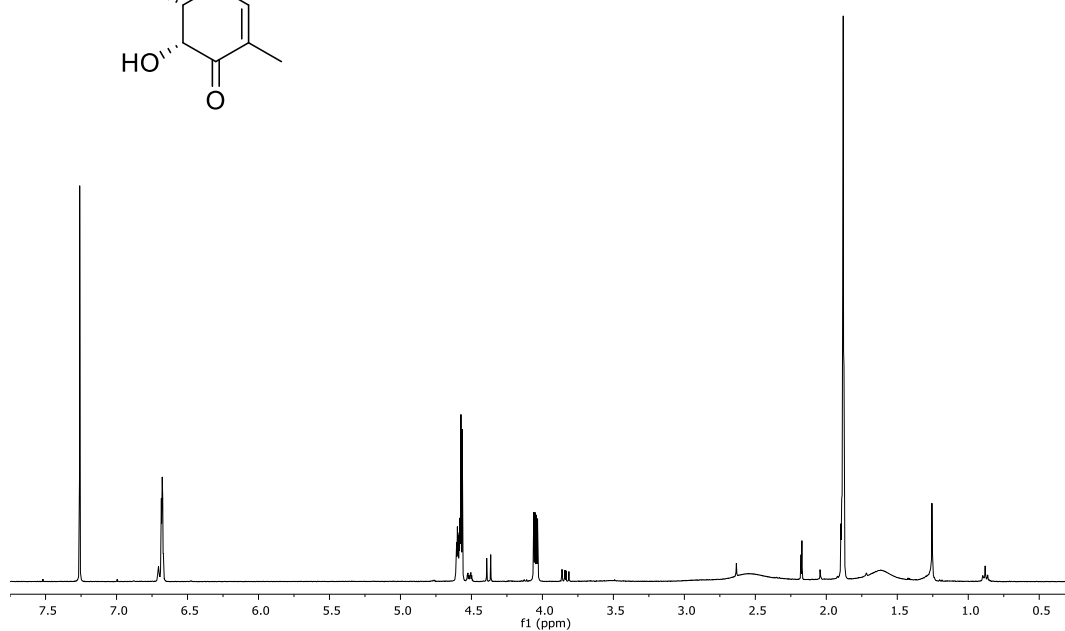

$^1\text{H-NMR}$  Spectrum of 7 (400MHz,  $\text{CDCl}_3$ )

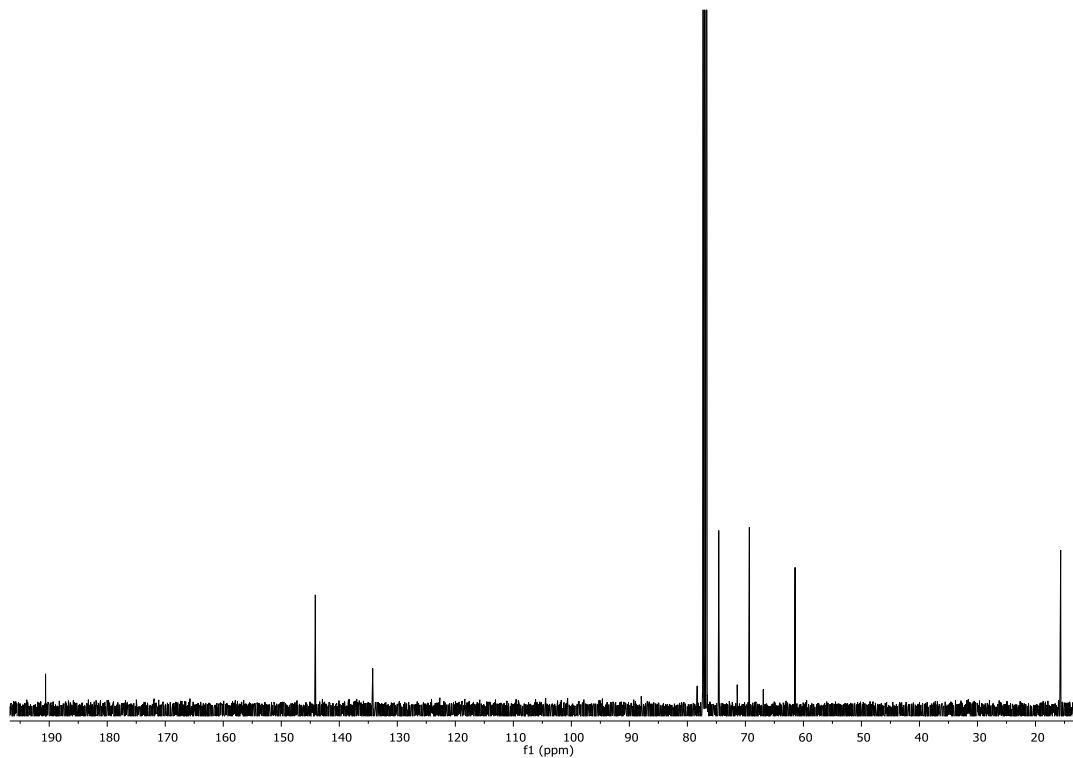

$^{13}\text{C-NMR}$  Spectrum of 7 (100MHz,  $\text{CDCl}_3$ )

(+)-*epi*-Epoformin, a phytotoxic fungal cyclohexenepoxide: Structure activity relationships

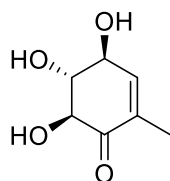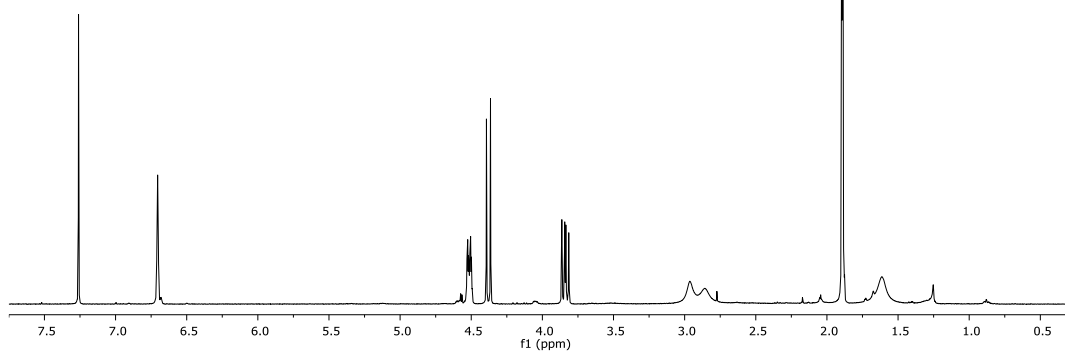

<sup>1</sup>H-NMR Spectrum of 8 (400MHz, CDCl<sub>3</sub>)

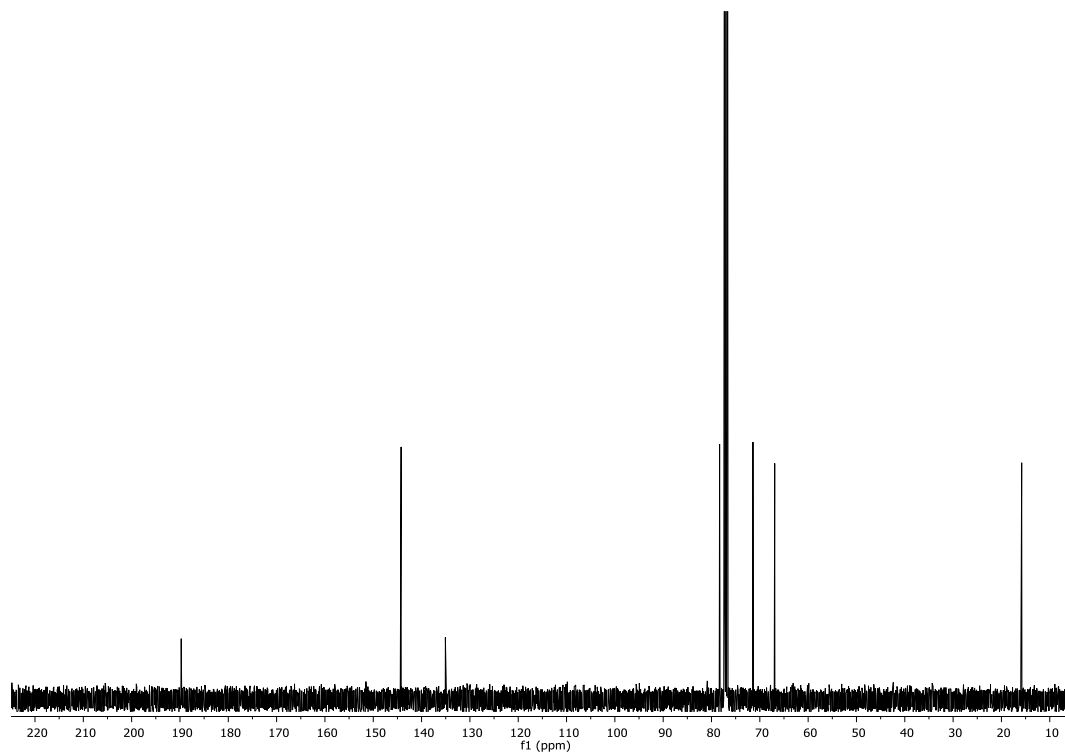

<sup>13</sup>C-NMR Spectrum of 8 (100MHz, CDCl<sub>3</sub>)

(+)-*epi*-Epoformin, a phytotoxic fungal cyclohexenepoxide: Structure activity relationships

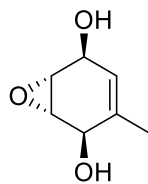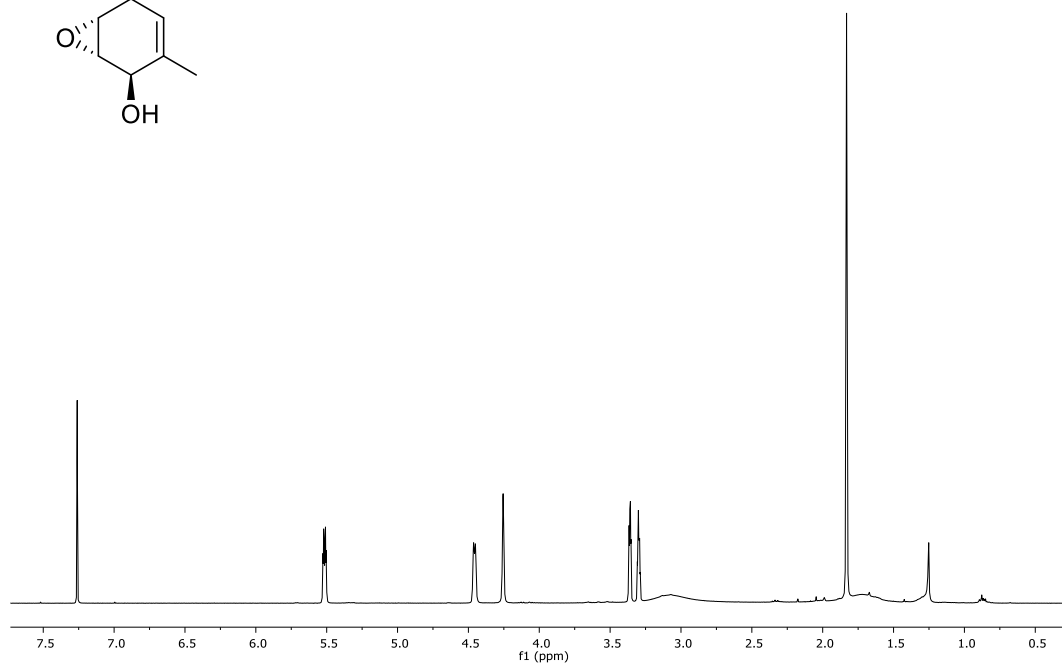

$^1\text{H-NMR}$  Spectrum of **9** (400MHz,  $\text{CDCl}_3$ )

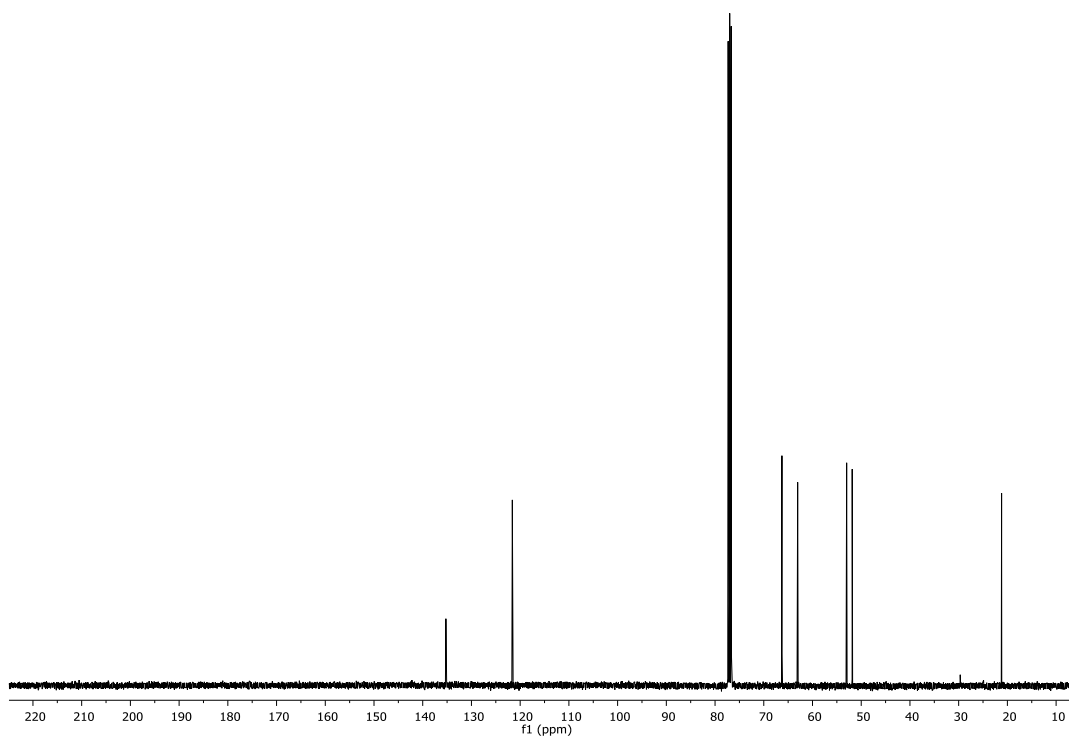

$^{13}\text{C-NMR}$  Spectrum of **9** (100MHz,  $\text{CDCl}_3$ )

(+)-*epi*-Epoformin, a phytotoxic fungal cyclohexenepoxide: Structure activity relationships
